# Supplementary material for: Dispersive liquid–liquid microextraction using magnetic room temperature ionic liquid for extraction of ultra-trace amounts of parabens
Source: Royal Society of Chemistry journal article supplement (doi:10.1039/c8nj01154k), 2018-01-01

## SUPPLEMENTAL INFORMATION

### **Dispersive liquid–liquid microextraction using magnetic room temperature ionic liquid for extraction ultra-trace amounts of parabens**

Kobra Zavar Mousavi <sup>1</sup>, Yadollah Yamini <sup>1\*</sup>, Shahram Seidi <sup>2</sup>

<sup>1</sup> *Department of Chemistry, Tarbiat Modares University, P.O. Box 14115-175, Tehran, Iran*

<sup>2</sup> *Department of Analytical Chemistry, K.N. Toosi University of Technology, Tehran, Iran*

**Fig. S1.** UV spectrum for the  $[N_{1,8,8,8}^+][FeCl_4^-]$  IL

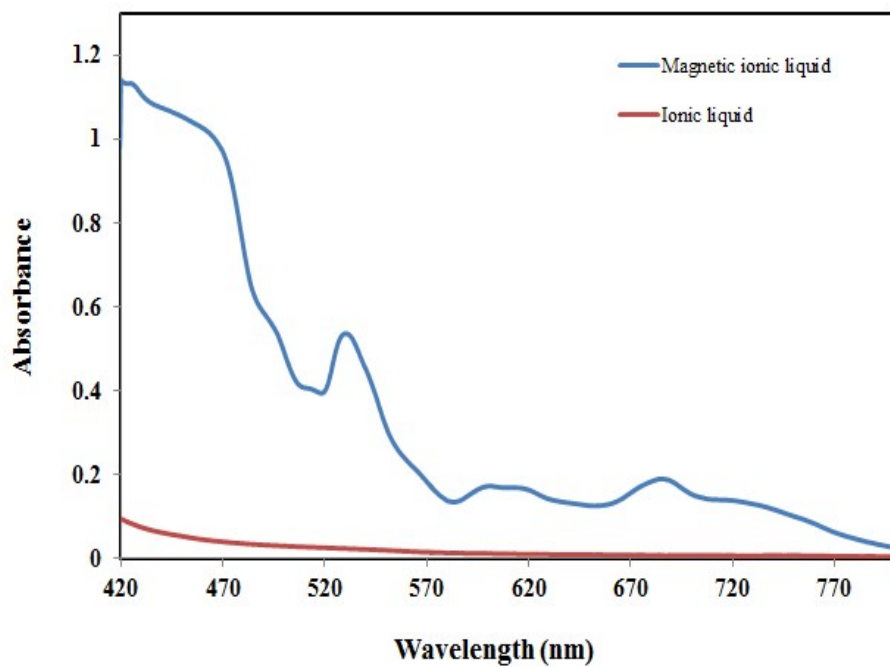

**Fig. S2.** Raman spectrum for the  $[N_{1,8,8,8}^+][FeCl_4^-]$  IL

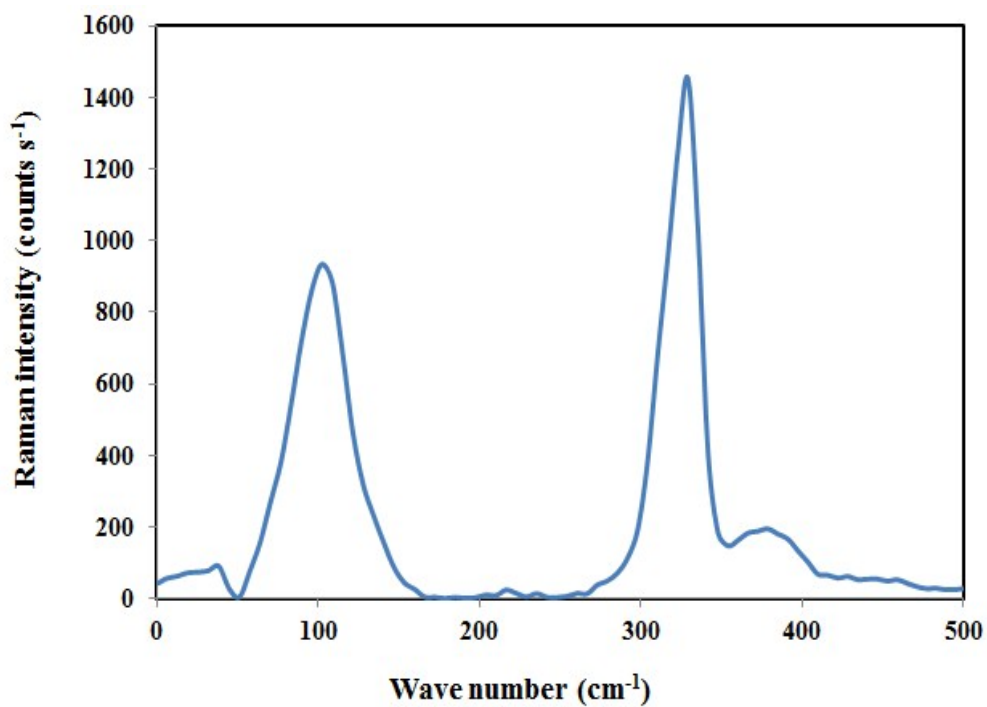

**Fig. S3.** The relationship between magnetization of  $[N_{1,8,8,8}^+][FeCl_4^-]$  and applied magnetic field

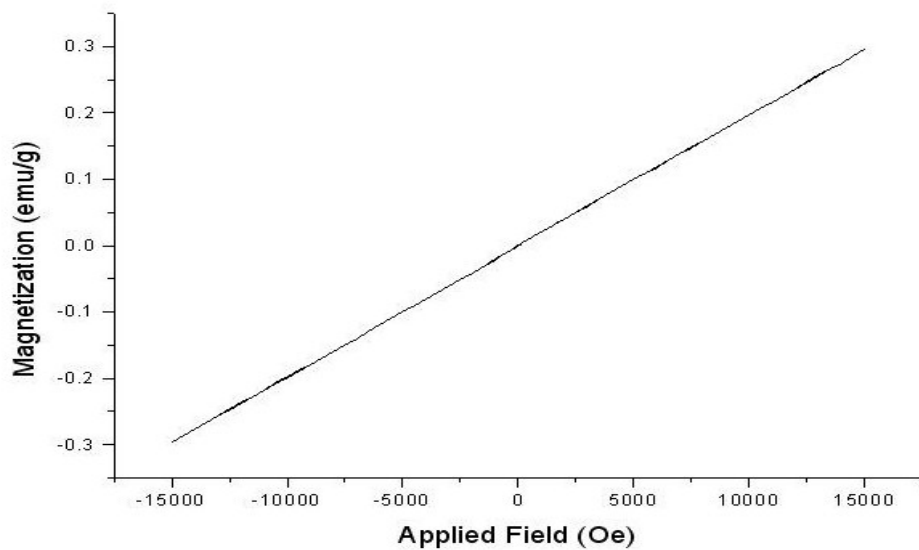

**Fig. S4.** Effect of volume of extraction solvent on the extraction efficiency of parabens.

Experimental conditions were the same as in Fig. 2, except volume of  $[N_{1,8,8,8}^+][FeCl_4^-]$

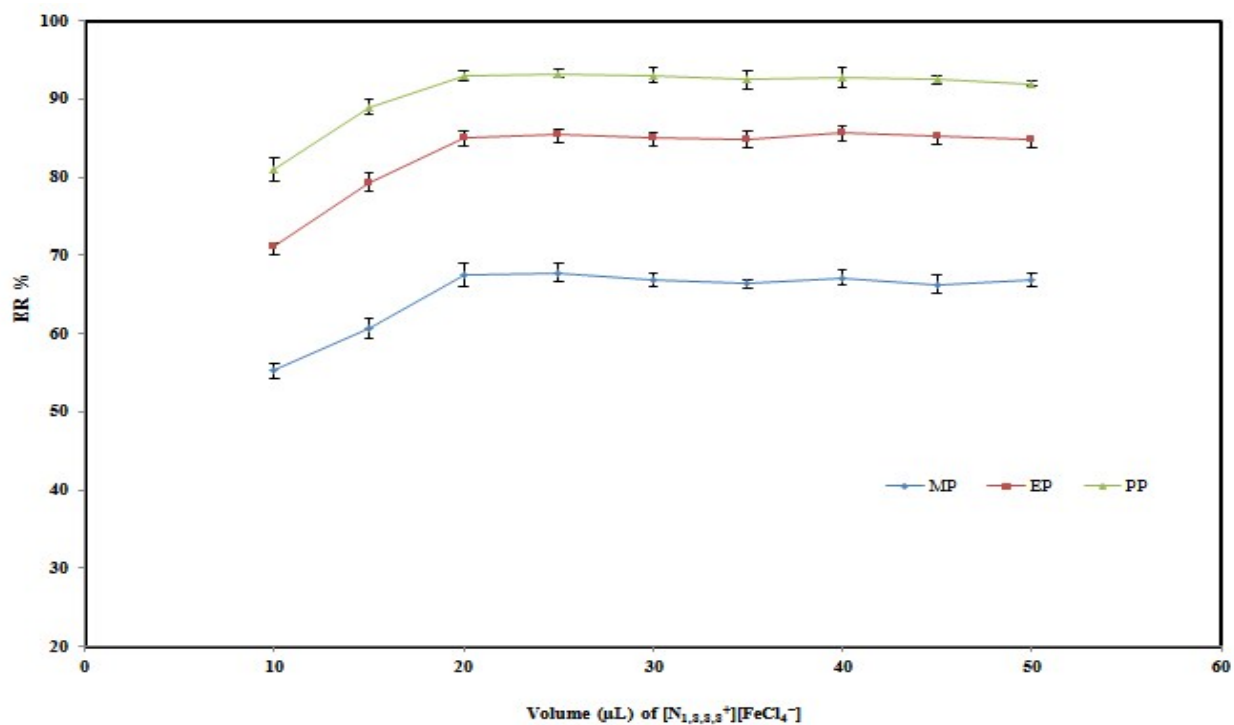

**Fig. S5.** Study of the type of dispersion force (vortex, sonication, or none)

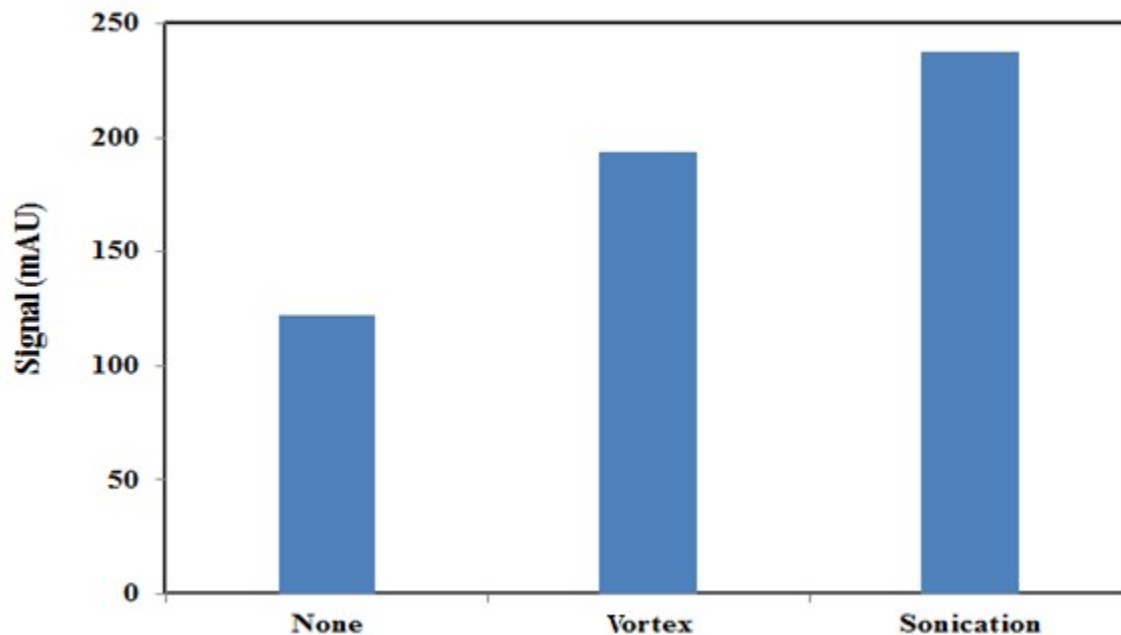

**Fig. S6.** Effect of sonication time on the extraction efficiency of parabens: Extraction conditions: concentration of analytes,  $100 \mu\text{g L}^{-1}$ ; sample volume, 20.0 mL; sample pH, 6.0; ionic strength, 10% w/v NaCl; sonication time, 1 min; volume of disperser solvent, 250  $\mu\text{L}$ ; disperser solvent, acetone.

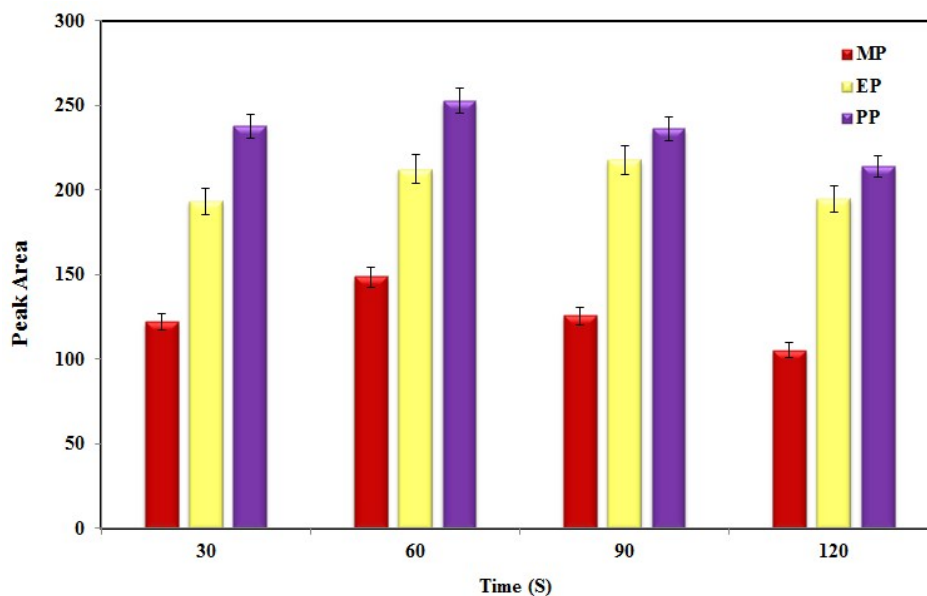

**Fig. S7.** CMC determination from surface tension vs aqueous concentration of  $[N_{1,8,8,8}^+][FeCl_4^-]$ .

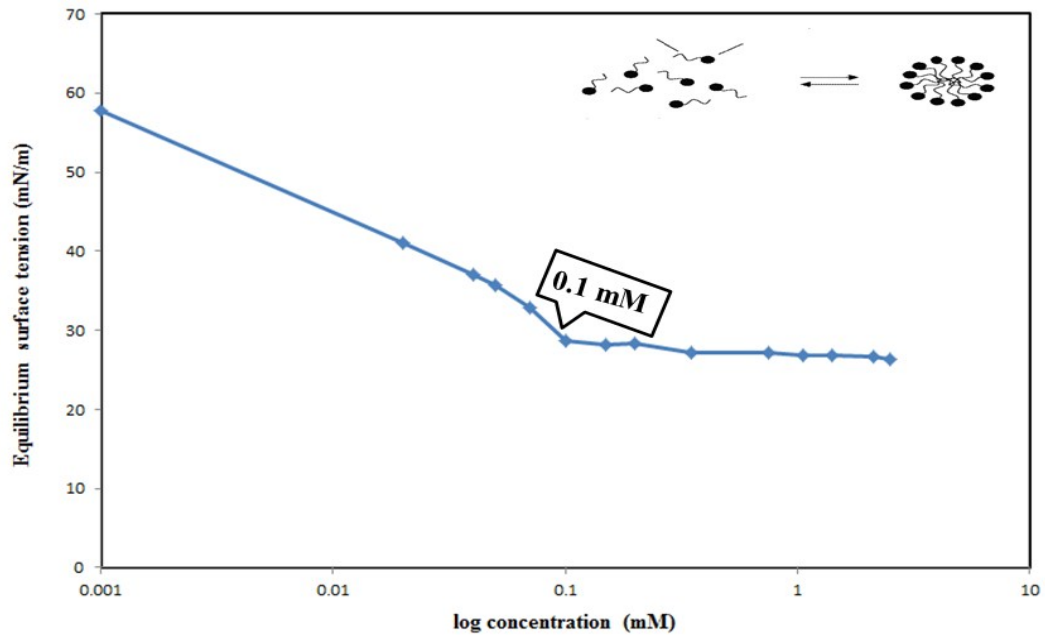

Supplement: c8nj01154k1.pdf [file c8nj01154k1.pdf]
